# Supplementary material for: Shape memory hydrogels with remodelable permanent shapes and programmable cold-induced shape recovery behavior
Source: Royal Society of Chemistry journal article supplement (doi:10.1039/d3sm01429k), 2023-12-05
Supplement: d3sm01429k7.pdf [file d3sm01429k7.pdf]

## Supplementary information

### Shape Memory Hydrogel with Remodelable Permanent Shapes and Programmable Cold-Induced Shape Recovery Behavior

Xinjun Wu<sup>1</sup>, Xin Guan<sup>1</sup>, Shushu Chen<sup>1</sup>, Jiangpeng Jia<sup>1</sup>, Chongyi Chen<sup>1</sup>, Jiawei Zhang<sup>2,\*</sup> and  
Chuanzhuang Zhao<sup>1,\*</sup>

<sup>a</sup>Mr. X. Wu, Ms. X. Guan, Ms. S. Chen, Mr. J. Jia, Prof. Dr. C. Chen, Prof. Dr. C. Zhao, School  
of Materials Science & Chemical Engineering, Key Laboratory of Impact and Safety  
Engineering, Ministry of Education, Ningbo University, Ningbo, Zhejiang 315211, China,

**\*Corresponding author.** E-mail: zhaochuanzhuang@nbu.edu.cn

<sup>b</sup>Prof. Dr. J. Zhang, School of Material Science and Engineering, Tiangong University, Tianjin  
300387, China,

**\*Corresponding author.** E-mail: zhangjiawei@tiangong.edu.cn

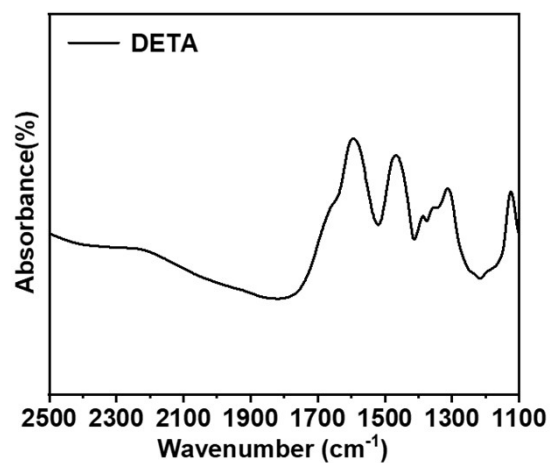

**Fig. S1.** FTIR spectrum of DETA.

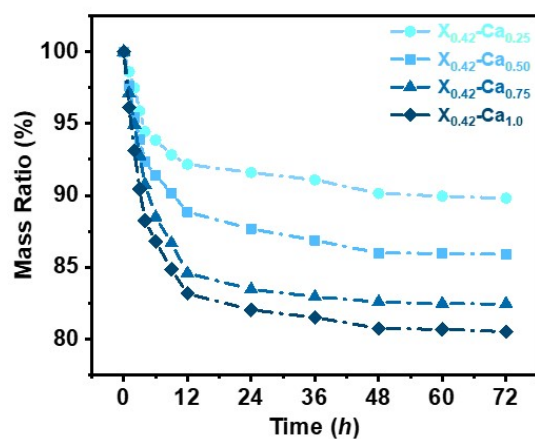

**Fig. S2.** Mass change curve of PAA/DETA hydrogels during immersing in calcium acetate solution over 72 h. Calcium acetate solutions (0.25 M, 0.5 M, 0.75 M, 1 M) were used.

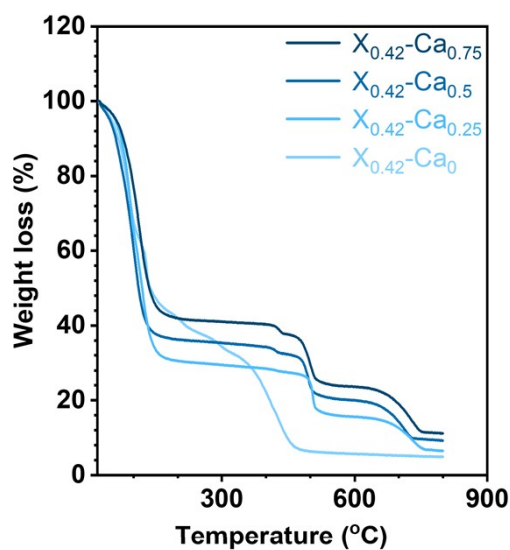

**Fig. S3.** TGA thermograms of 2CH-gel with 0.42 M of DETA and with different  $\text{Ca}(\text{Ac})_2$  concentration.

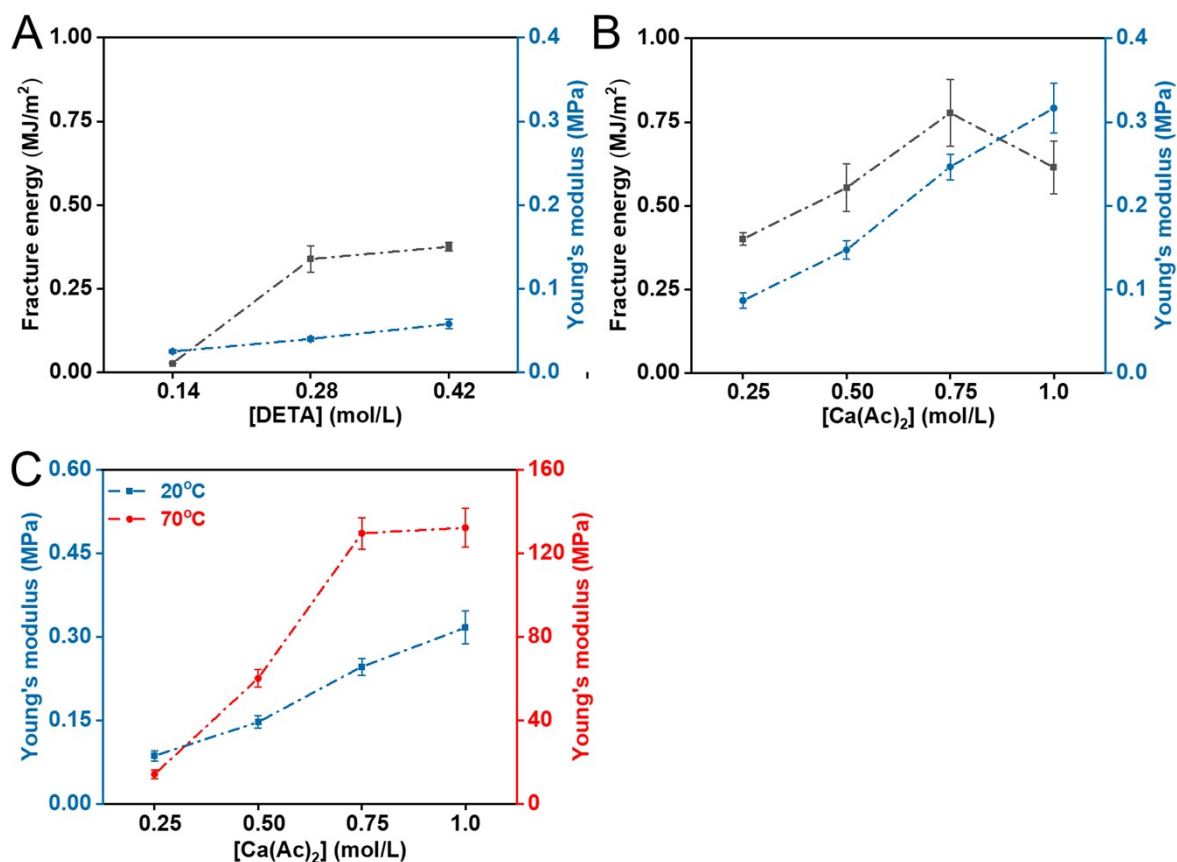

**Fig. S4.** Comparison of mechanical properties of 2CH-gel. (A) Comparison of fracture energy and modulus of PAA/DETA at different DETA concentrations at 20°C. (B) Comparison of fracture energy and modulus of PAA/DETA at different calcium acetate concentrations at 20°C. The concentration of DETA concentration is 0.42 M. (C) Comparison of the modulus of PAA/DETA at 20°C and 70°C with different calcium acetate concentrations. The concentration of DETA is 0.42 M.

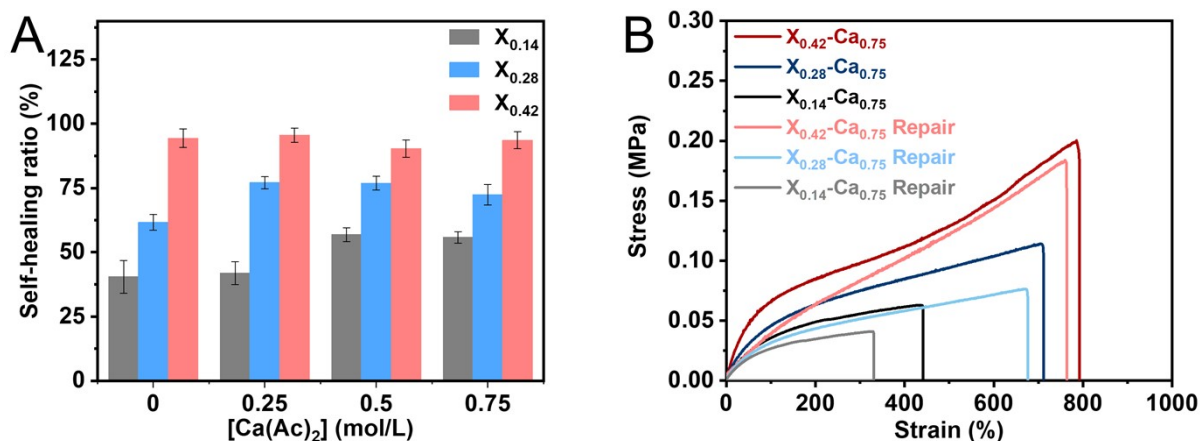

**Fig. S5.** Self-healing properties of 2CH-gel. (A) The self-healing efficiency of 2CH-gel with different concentration of DETA and Ca(Ac)<sub>2</sub>. (B) tensile curves of 2CH-gel before and after self-healing.

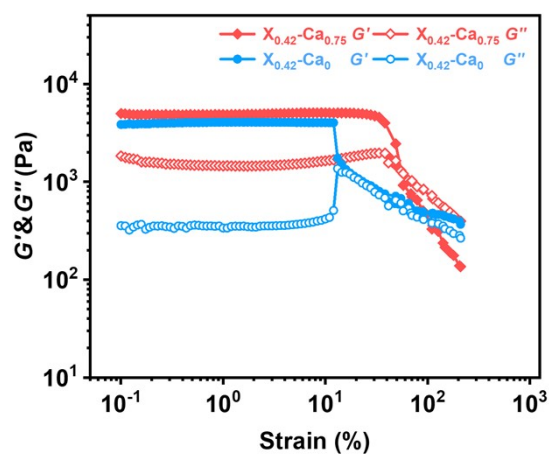

**Fig. S6.** Oscillatory amplitude sweep of 2CH-gel with and without  $\text{Ca}(\text{Ac})_2$ .

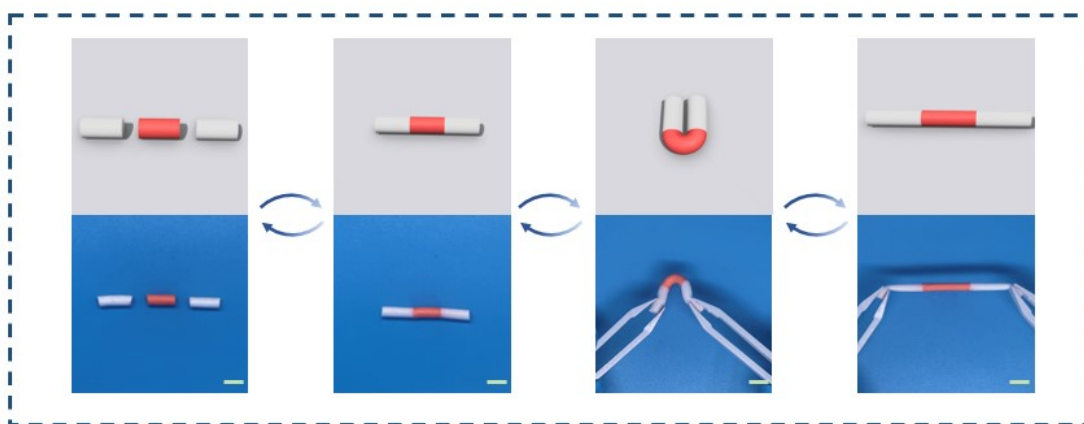

**Fig. S7.** Photos showing the self-healing performance of 2CH-gel. The 2CH-gel is broken into 3 sections by external force, and the 3 sections are placed together in a humid environment and can repair themselves with only 10 seconds of gentle pressure, the middle hydrogel is stained with eosin to make the display effect more obvious. Scale bars = 1.0 cm.

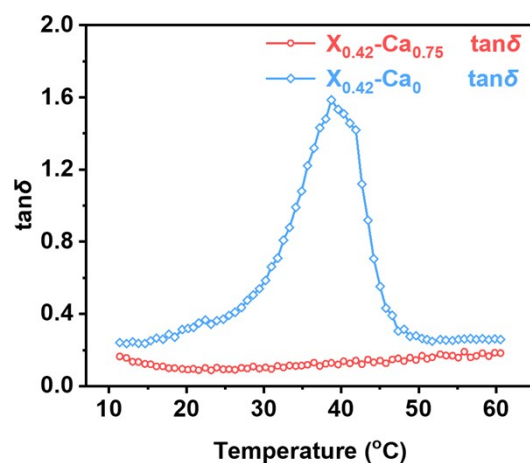

**Fig. S8.** Loss tangent as function of temperature of 2CH-gel with and without  $\text{Ca}(\text{Ac})_2$ .

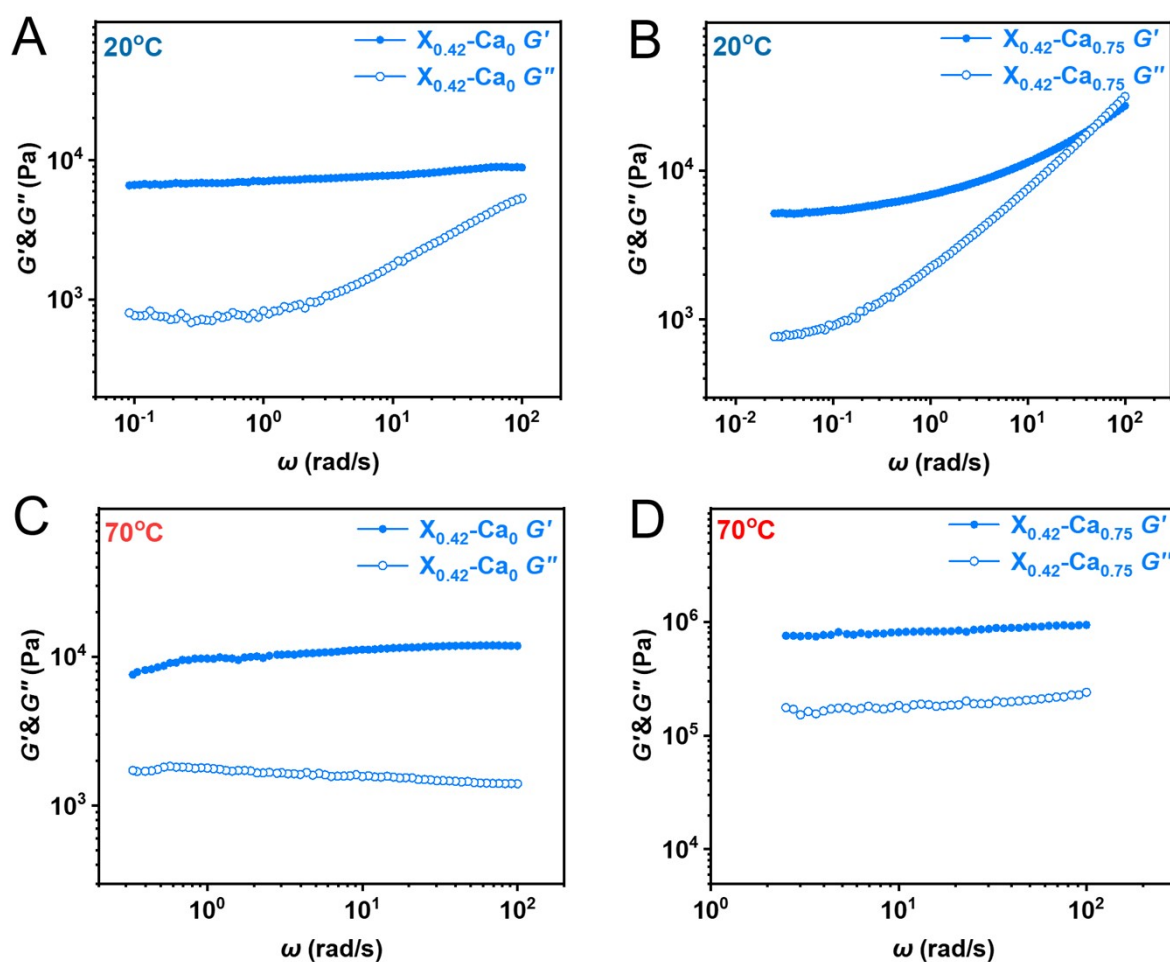

**Fig. S9.** Angular frequency sweeps of 2CH-gel at different temperatures. (A) Storage modulus and loss modulus of  $X_{0.42}\text{-Ca}_0$  at 20°C. (B) Storage modulus and loss modulus of  $X_{0.42}\text{-Ca}_{0.75}$  at 20°C. (C) Storage modulus ( $G'$ ) and loss modulus ( $G''$ ) of  $X_{0.42}\text{-Ca}_0$  at 70°C. (D) Storage modulus and loss modulus of  $X_{0.42}\text{-Ca}_{0.75}$  at 70°C. All experimental strains were 0.05%.

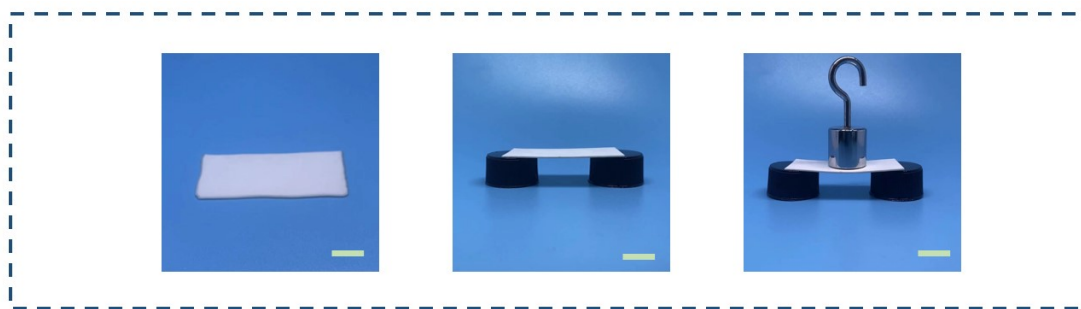

**Fig. S10.** Photos showing the thermal stiffening effect of 2CH-gel. A piece of 2CH-gel was heated in hot water at 70°C for 10 s, and then it could support a 100 g weight without deformation. (Sample size: ~20 mm × 60 mm × 1 mm). Scale bars = 1.0 cm.

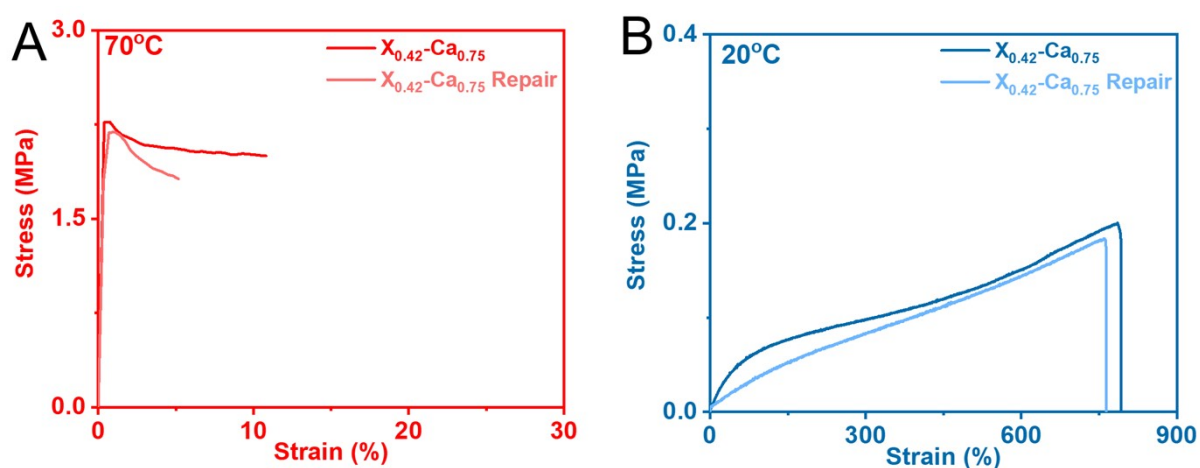

**Fig. S11.** Stress-strain curves of  $X_{0.42}\text{-Ca}_0$  and  $X_{0.42}\text{-Ca}_{0.75}$  before and after self-healing at 20 °C and 70 °C.

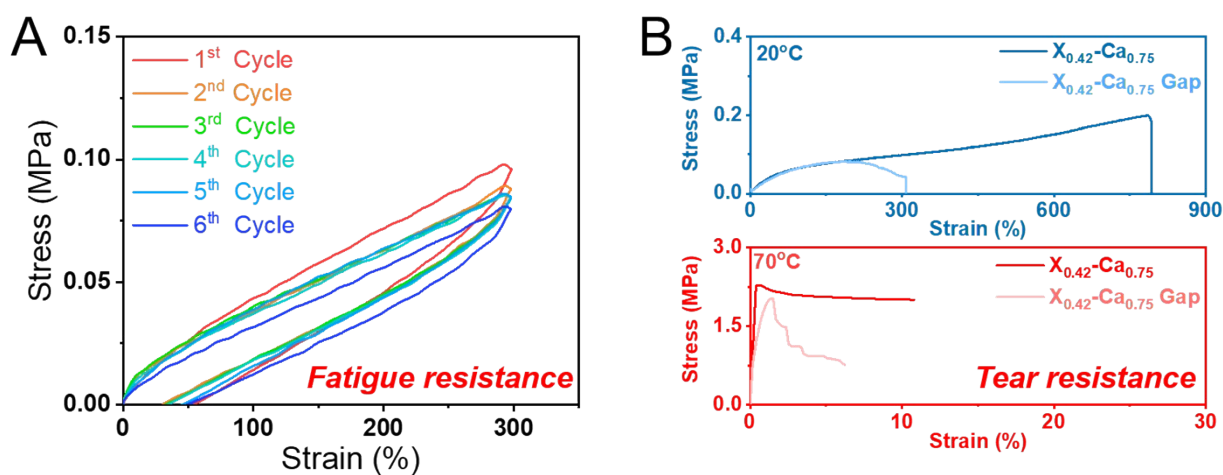

**Fig. S12.** (A) Fatigue resistance of  $X_{0.42}\text{-Ca}_{0.75}$ . (B) Tear resistance of  $X_{0.42}\text{-Ca}_{0.75}$ .

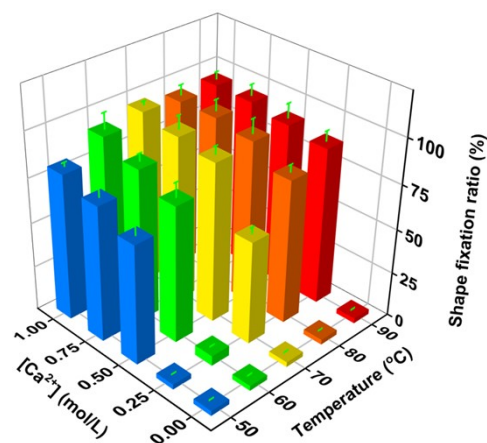

**Fig. S13.** The influences of the temperature and concentration of  $\text{Ca}(\text{Ac})_2$  aqueous solution on the shape fixity ratio of 2CH-gel.

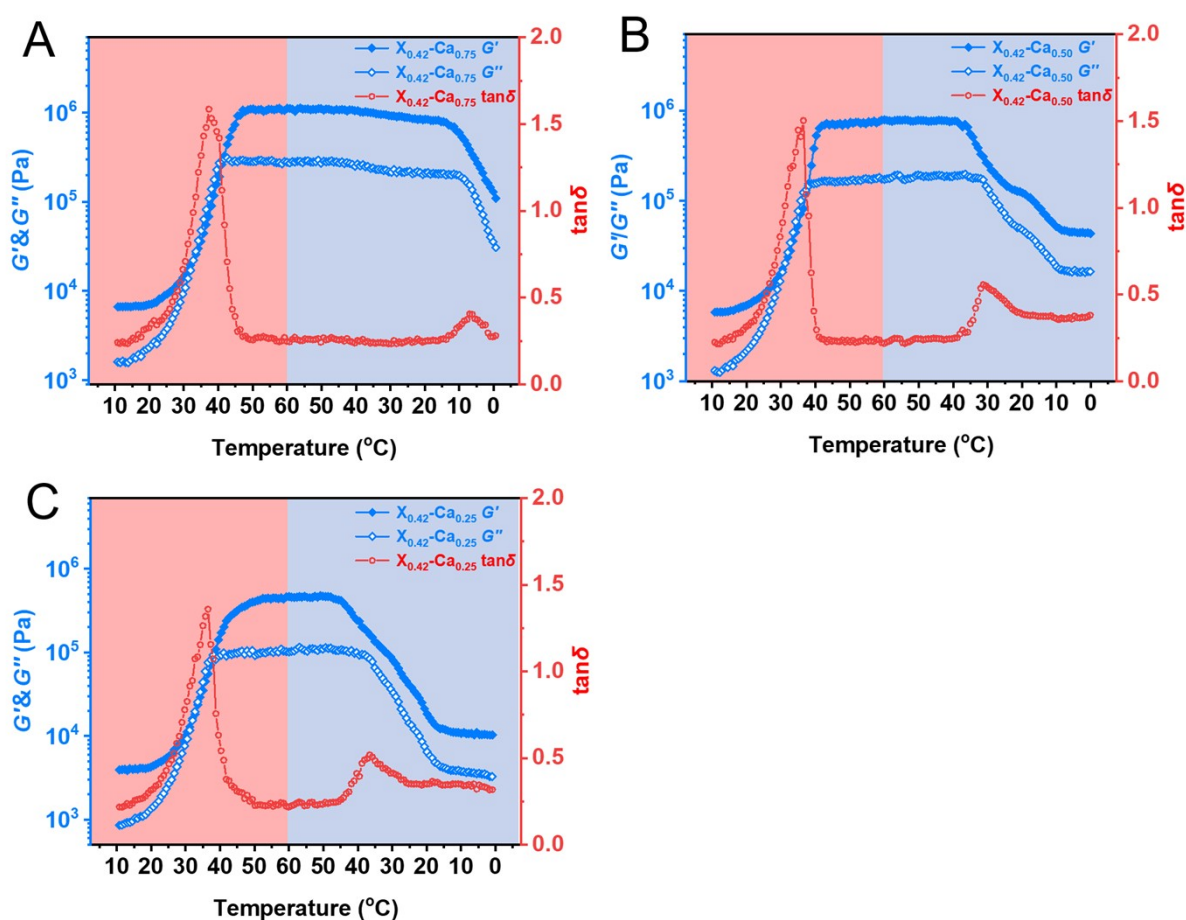

**Fig. S14.** Storage modulus ( $G'$ ) and loss modulus ( $G''$ ) of 2CH-gel as a function of temperature. (A) Storage modulus ( $G'$ ) and loss modulus ( $G''$ ) of  $X_{0.42}\text{-Ca}_{0.75}$  as a function of temperature. (B) Storage modulus ( $G'$ ) and loss modulus ( $G''$ ) of  $X_{0.42}\text{-Ca}_{0.50}$  as a function of temperature. (C) Storage modulus ( $G'$ ) and loss modulus ( $G''$ ) of  $X_{0.42}\text{-Ca}_{0.25}$  as a function of temperature.

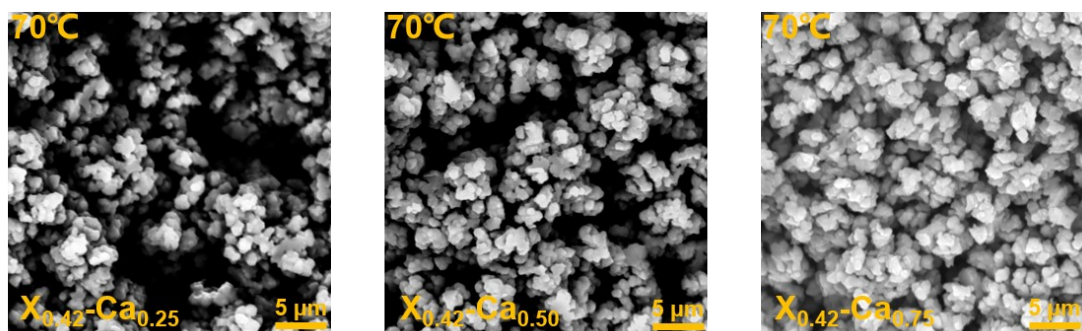

**Fig. S15.** Scanning electron micrographs of  $X_{0.42}\text{-Ca}_{0.25}$ ,  $X_{0.42}\text{-Ca}_{0.50}$  and  $X_{0.42}\text{-Ca}_{0.75}$  at 70°C.

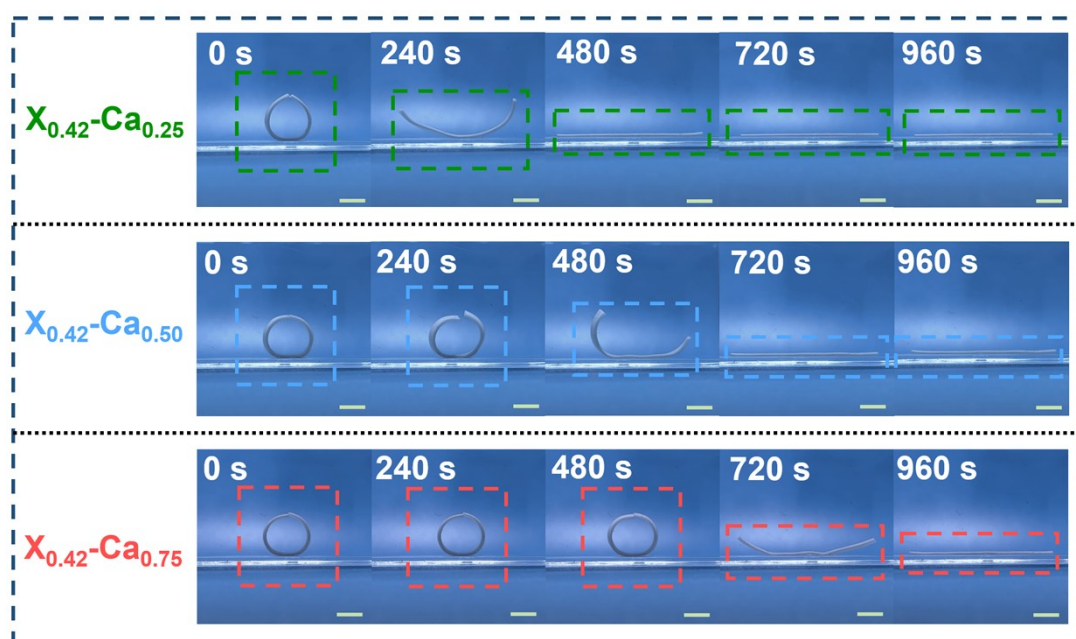

**Fig. S16.** Photos showing the shape recovery of  $X_{0.42}\text{-Ca}_{0.25}$ ,  $X_{0.42}\text{-Ca}_{0.50}$ , and  $X_{0.42}\text{-Ca}_{0.75}$  after shape fixation in 70 °C water for 10 s.

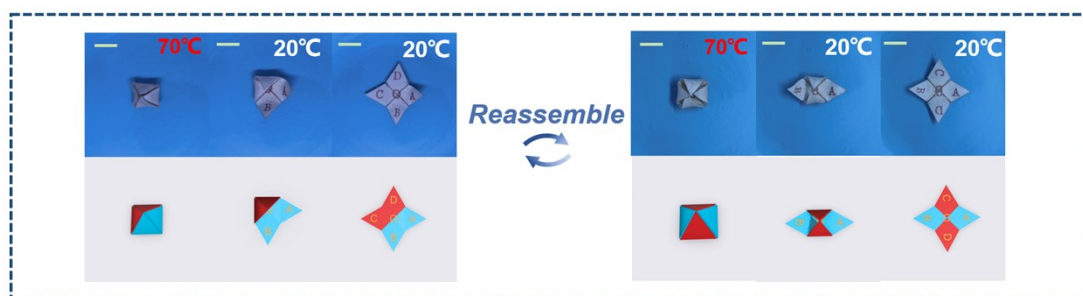

**Fig. S17.** 3D message encryption display of 2CH-gel.  $X_{0.42}\text{-Ca}_{0.50}$  and  $X_{0.42}\text{-Ca}_{0.75}$  hydrogels are assembled into a star-shape, letters are printed on each corner and the star-shaped hydrogel are fixed into a tetrahedron by heating at 70°C. Each corner has a different opening speed to display information (left), while the star-shaped hydrogel can be re-assembled to display different information (right). Scale bars = 1.0 cm.

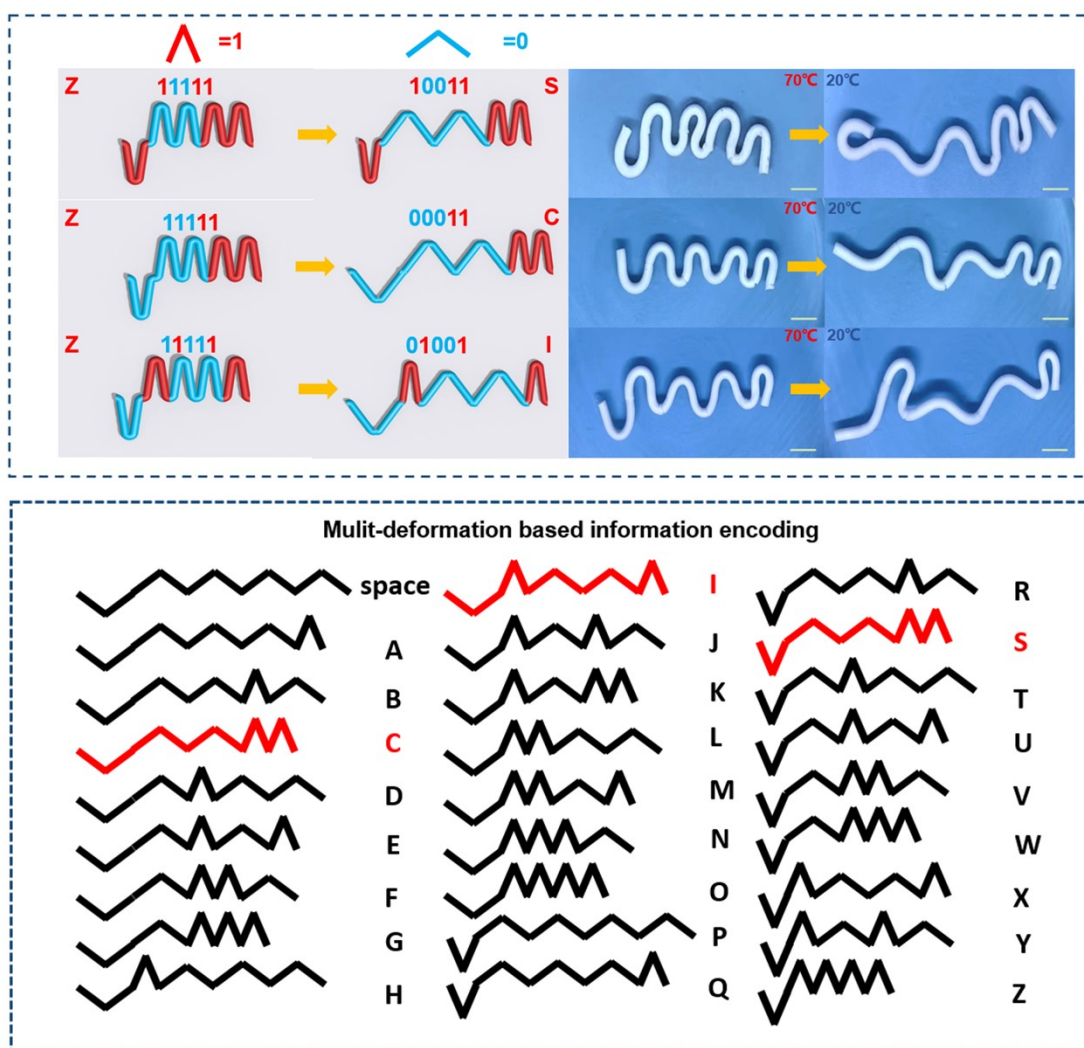

**Fig. S18.** Schematic illustration and photos showing the information encryption and decryption of 2CH-gel based on the editable shape memory function.  $X_{0.42}\text{-Ca}_{0.50}$  and  $X_{0.42}\text{-Ca}_{0.75}$  hydrogel strips were put together in different sequences, then the hydrogel strip was fixed into specific shapes at 70°C, and the hydrogel could display different messages due to the different softening times of each hydrogel pieces. Scale bars = 1.0 cm.

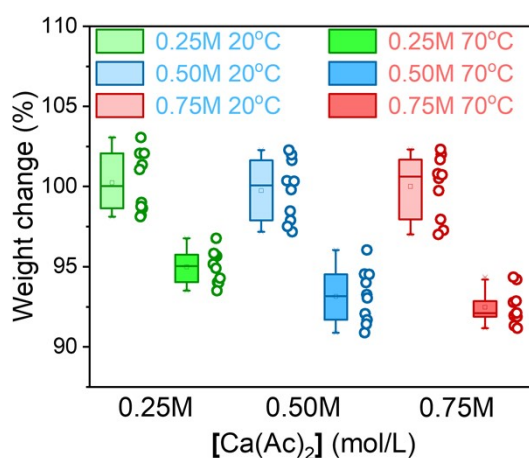

**Fig. S19.** Weight change before (20°C) and after (70°C) phase separation, sample numbers  $n = 10$ .

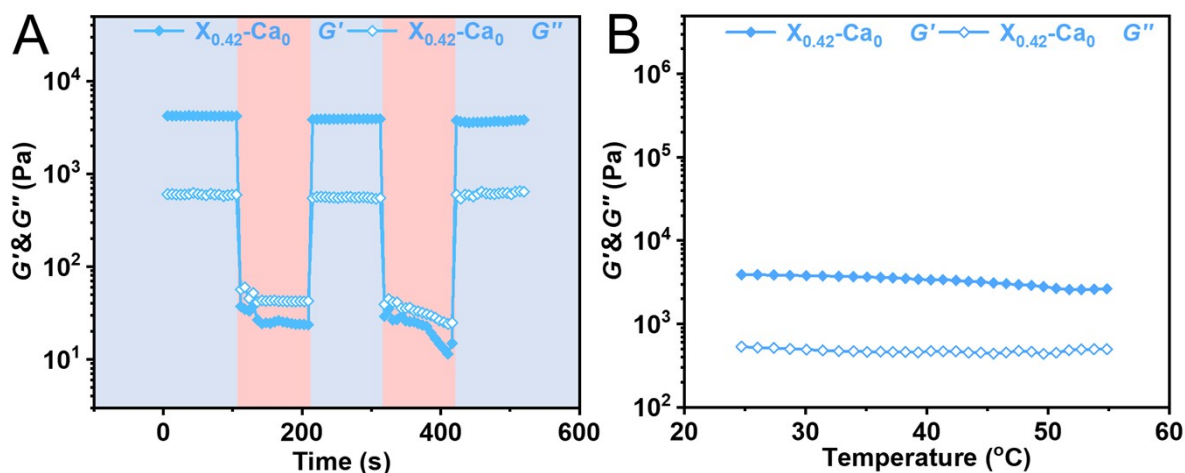

**Fig. S20.** (A) Alternating strain rheology curves (high strain (250%) and low strain (1.0%)) of 2CH-gel without  $\text{Ca}(\text{Ac})_2$  after being remodeled. (B) Temperature scanning rheology curves of 2CH-gel without  $\text{Ca}(\text{Ac})_2$  after being remodeled.

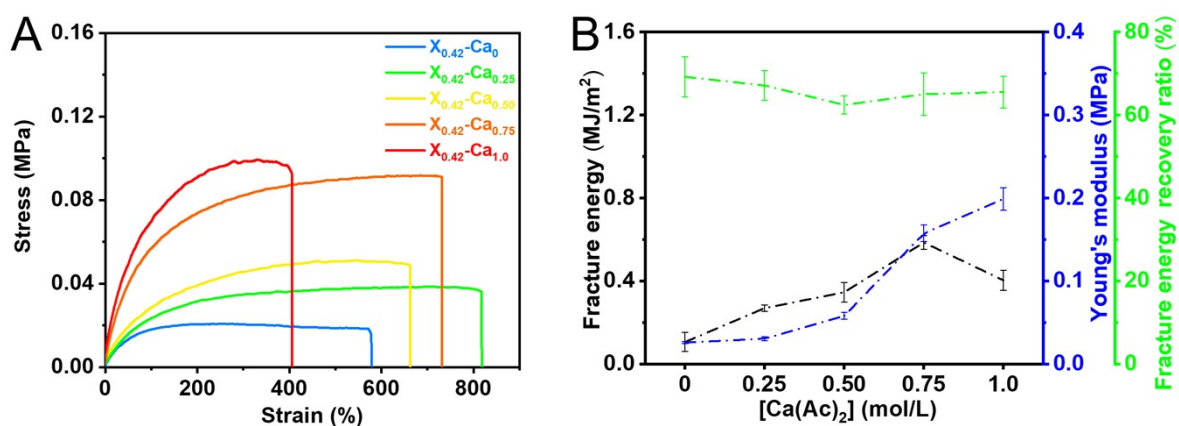

**Fig. S21.** (A) Tensile curves of 2CH-gel after remodeling. (B) The Young's modulus, fracture energy, and fracture energy recovery rate of 2CH-gel after remodeling.

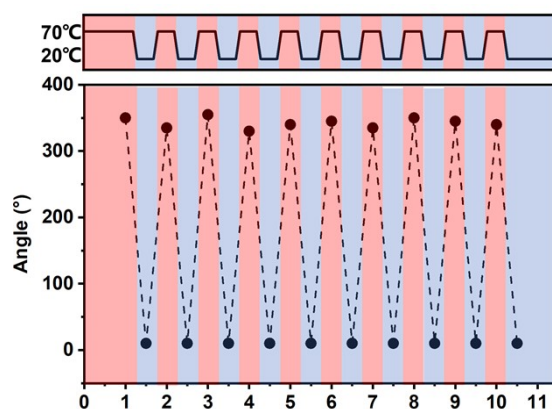

**Fig. S22.** Cyclic testing indicates the reversible phase separation behavior exhibited by 2CH-gel after remodeling.

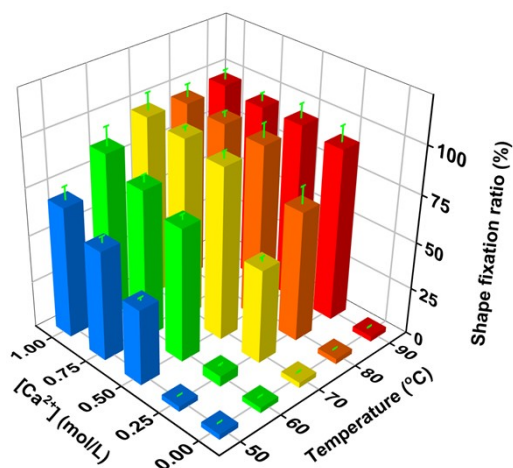

**Fig. S23.** The influences of the temperature and concentration of  $\text{Ca}(\text{Ac})_2$  aqueous solution on the shape fixity ratio of 2CH-gel after remodeling.

**Table S1.** Compositions for 2CH-gel in this work.

| Entry | Sample                      | AAc<br>(mol L <sup>-1</sup> ) | DETA<br>(mol L <sup>-1</sup> ) | $\text{Ca}(\text{Ac})_2$<br>(mol L <sup>-1</sup> ) |
|-------|-----------------------------|-------------------------------|--------------------------------|----------------------------------------------------|
| 1     | $X_0\text{-Ca}_0$           | 3.5                           | 0                              | 0                                                  |
| 2     | $X_{0.14}\text{-Ca}_0$      | 3.5                           | 0.14                           | 0                                                  |
| 3     | $X_{0.28}\text{-Ca}_0$      | 3.5                           | 0.28                           | 0                                                  |
| 4     | $X_{0.42}\text{-Ca}_0$      | 3.5                           | 0.42                           | 0                                                  |
| 5     | $X_{1.2}\text{-Ca}_0$       | 3.5                           | 1.2                            | 0                                                  |
| 6     | $X_{0.42}\text{-Ca}_{0.25}$ | 3.5                           | 0.42                           | 0.25                                               |
| 7     | $X_{0.42}\text{-Ca}_{0.50}$ | 3.5                           | 0.42                           | 0.50                                               |
| 8     | $X_{0.42}\text{-Ca}_{0.75}$ | 3.5                           | 0.42                           | 0.75                                               |
| 9     | $X_{0.42}\text{-Ca}_{1.0}$  | 3.5                           | 0.42                           | 1.0                                                |
| 10    | $X_{0.14}\text{-Ca}_{0.75}$ | 3.5                           | 0.14                           | 0.75                                               |
| 11    | $X_{0.28}\text{-Ca}_{0.75}$ | 3.5                           | 0.28                           | 0.75                                               |

**Table S2.** Comparison of mechanical properties before and after remodeling of  $X_{0.42}\text{-Ca}_{0.75}$  at 70 °C.

| $X_{0.42}\text{-Ca}_{0.75}$                               | Original<br>state | Remodeled<br>state | Recyle<br>efficiency (%) |
|-----------------------------------------------------------|-------------------|--------------------|--------------------------|
| Thermal hardening fracture<br>energy (MJ/m <sup>2</sup> ) | 0.220             | 0.0687             | 31.2                     |
| Thermal hardening young's<br>modulus (MPa)                | 130               | 104                | 80.5                     |
| Thermal hardening breaking<br>elongation (%)              | 10.8              | 5.72               | 52.9                     |

**Table S3.** Comparison of mechanical properties before and after remodeling of  $X_{0.42}\text{-Ca}_{0.75}$  at 20 °C.

| $X_{0.42}\text{-Ca}_{0.75}$             | Original<br>state | Remodeled<br>state | Recyle efficiency<br>(%) |
|-----------------------------------------|-------------------|--------------------|--------------------------|
| Fracture energy<br>(MJ/m <sup>2</sup> ) | 0.913             | 0.567              | 62.1                     |
| Young's modulus<br>(MPa)                | 0.157             | 0.0942             | 59.8                     |
| Breaking elongation<br>(%)              | 792               | 731                | 92.3                     |
